# Supplementary material
Source: PubMed Central journal article supplement (PMC9285364)
Supplement: PRCA-15-0-s003.pdf [file PRCA-15-0-s003.pdf]

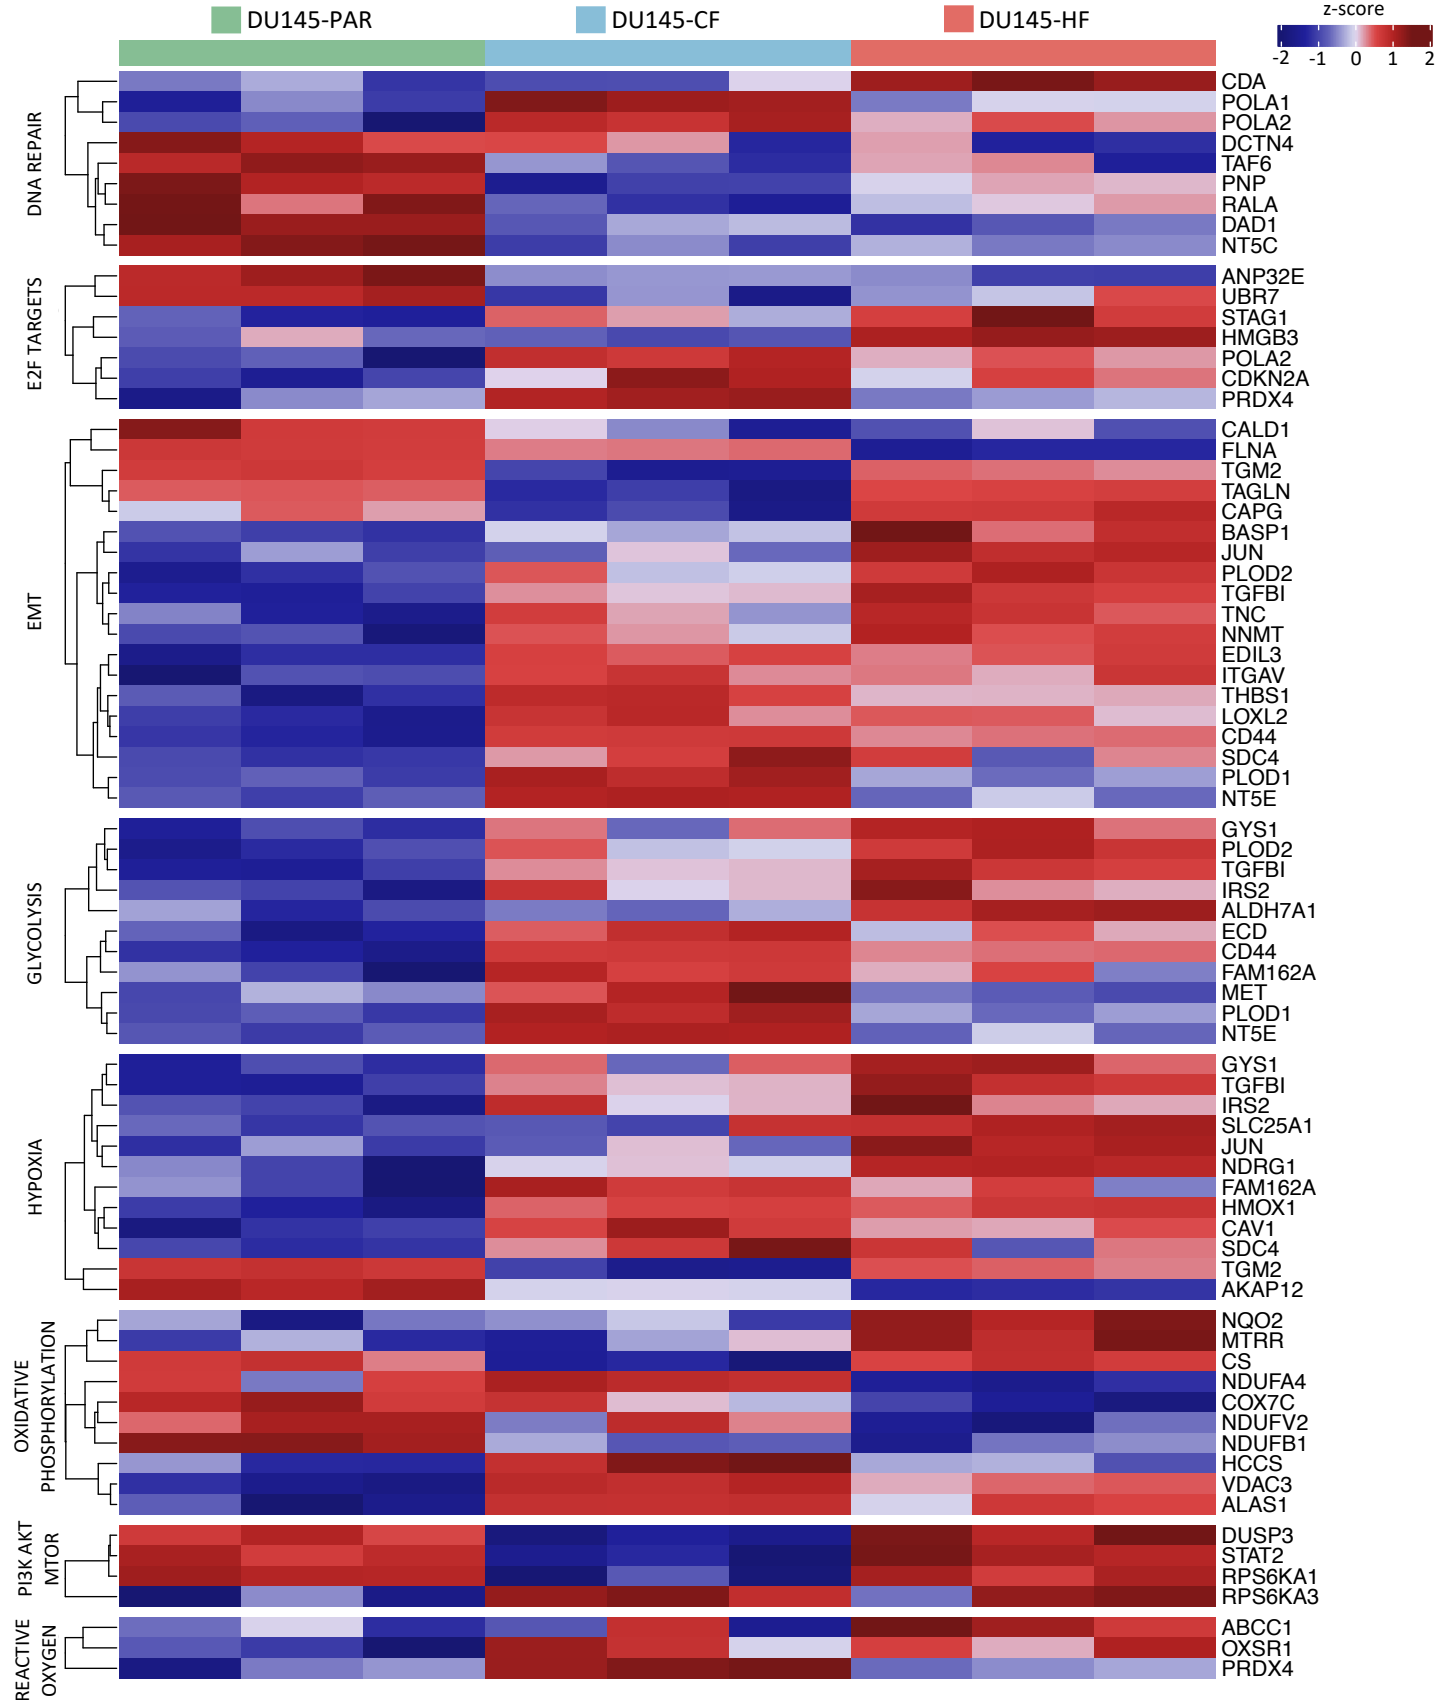

### Supplementary Figure 02: Pathways implicated in radiation resistance.

The 4,410 proteins detected in the whole cell lysate data across the DU145-PAR, DU145-CF, and DU145-HF cell lines compared to the 50 Hallmarks of Cancer gene lists from the Molecular Signatures Database (MsigDB). Pathways of interest – which have previously been implicated in radiation resistance and with significantly differentially expressed proteins – showing changes across the three cell lines were selected and are listed on the left of this stacked heatmap. Normalized iBAQ values were converted to z-scores for data visualization.
