# Supplementary material
Source: PubMed Central journal article supplement (PMC9285364)
Supplement: PRCA-15-0-s005.pdf [file PRCA-15-0-s005.pdf]

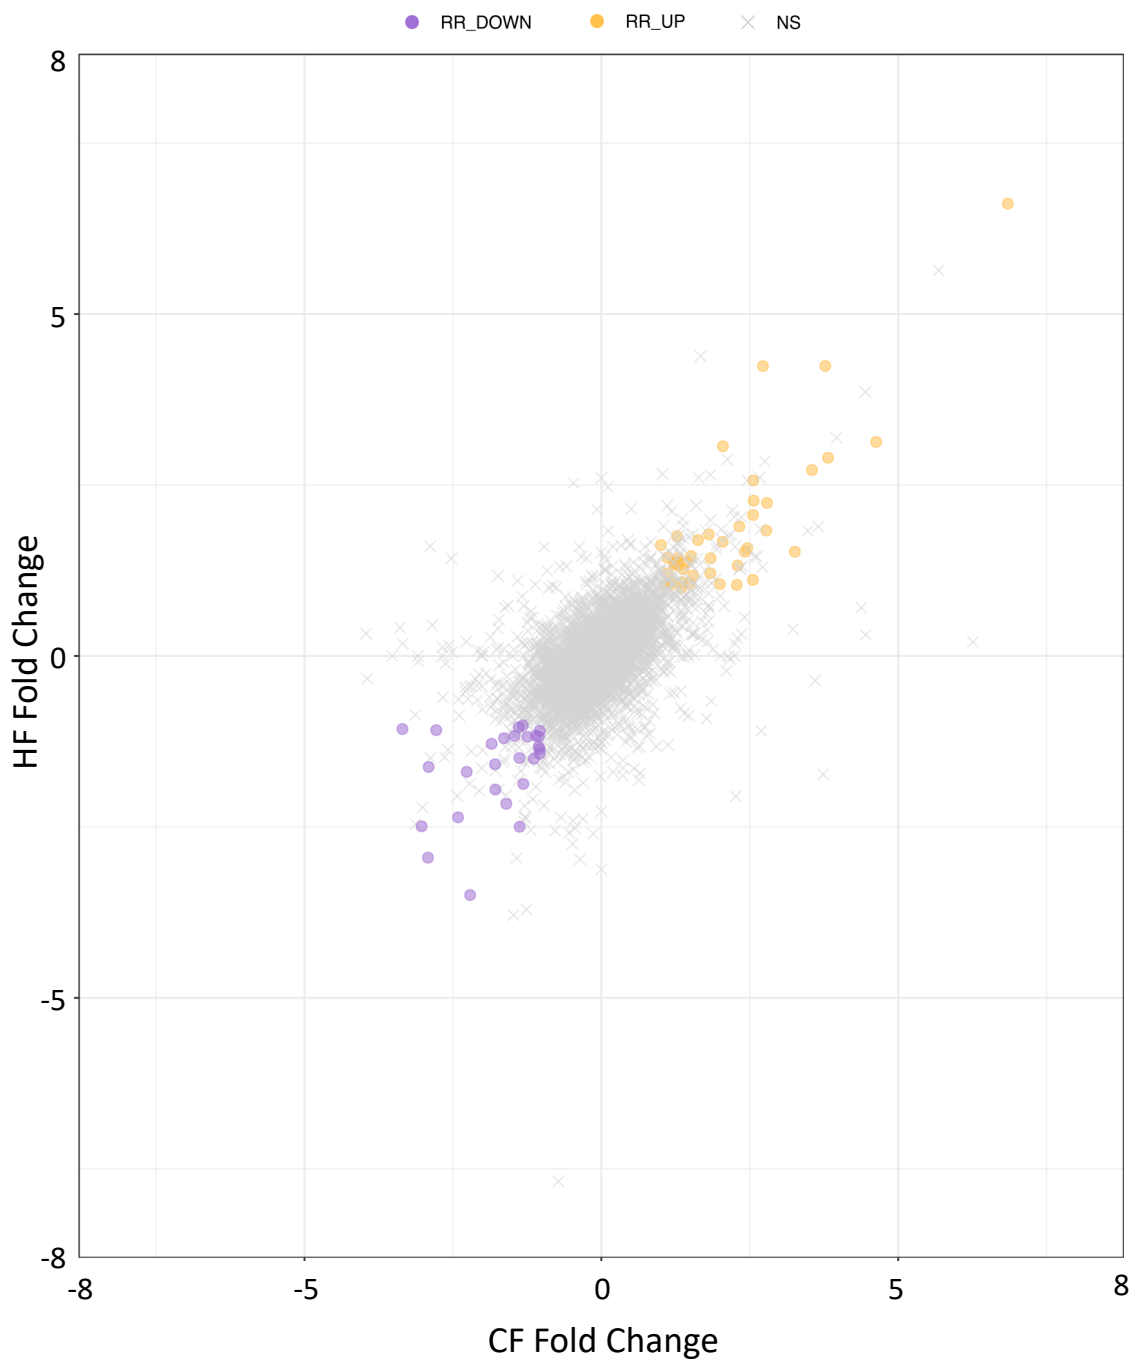

**Supplementary Figure 3: Radiation Enriched Proteins.**

Scatter plot showing the fold change of the DU145-HF cell lines (as compared to DU145-PAR) and the DU145-CF cells (as compared to DU145-PAR). Circles represent proteins with a  $p$ -value < 0.05. Lower left quadrant and upper right quadrant (representing radiation resistant downregulated and upregulated proteins, respectively) are highlight and were used as the input data for Figure 4.A.
